# Supplementary material for: miRNA Expression in Control and FSHD Fetal Human Muscle Biopsies
Source: PLoS One. 2015 Feb 18;10(2):e0116853. doi: 10.1371/journal.pone.0116853 (PMC4333765; doi:10.1371/journal.pone.0116853)
Supplement: S3 Table — (XLSX) [file pone.0116853.s005.xlsx]

## Sheet: hgOver.BP.probes.csv
Table S3- Biological processes significantly enriched in the set of predicted targets of FSHD exclusive microRNAs (xls).
GOBPID	Pvalue	OddsRatio	ExpCount	Count	Size	Term	Gene
GO:0051552	6.14137e-08	Inf	0.181224	5	5	flavone metabolic process	UGT1A10; UGT1A8; UGT1A7; UGT1A9; UGT1A1
GO:0052696	6.14137e-08	Inf	0.181224	5	5	flavonoid glucuronidation	UGT1A8; UGT1A7; UGT1A9; UGT1A1; UGT1A3
GO:0052697	6.14137e-08	Inf	0.181224	5	5	xenobiotic glucuronidation	UGT1A8; UGT1A7; UGT1A9; UGT1A1; UGT1A3
GO:0007417	8.31896e-08	2.5612	20.4058	47	563	central nervous system development	DCX; DLX1; RCAN1; AGTR2; E2F1; EPHA4; FOXG1; AFF2; DICER1; CNTNAP2; GAS1; HTRA2; GNAO1; NDST1; ID2; APP; ARF4; ACCN1; NEUROD2; NF1; NFIB; NOTCH1; NR4A2; PAFAH1B1; PAM; LEF1; PLXNA2; AXL; PRTFDC1; BCL2; BMI1; BCL11B; BMPR2; SMARCA4; SOX2; SOX4; CNTN2; XRCC4; LRP8; RNF103; PGAP1; NR4A3; JHDM1D; CASP2; DIXDC1; SYNJ1; NUMBL
GO:0048523	1.56222e-07	1.76874	80.6459	125	2262	negative regulation of cellular process	CDK6; MAEA; SEMA4F; TOB2; CHEK1; FOXN3; SOX21; BAZ2A; AP2M1; CLTA; DCBLD2; CTH; DBC1; DLX1; JAG1; RCAN1; E2F1; EIF2C4; EGR1; UBR1; ELF1; EPHA4; ESR1; FOXG1; ZNF423; SATB2; DICER1; TARDBP; ZNF281; FRK; SOSTDC1; SIN3A; CLIP3; GAS1; GCG; RGS17; FOXP1; DLL1; TRIB2; GRM5; GRM7; STRN3; SH3KBP1; APBB2; HSPA1B; ID1; ID2; APP; JAK2; MEF2C; MYCN; NEUROD2; NFIB; NOTCH1; NOTCH2; NR4A2; PAFAH1B1; INSIG2; DYNC…
GO:0048468	9.46661e-07	1.99091	38.8632	70	1089	cell development	MAEA; SEMA4F; DPYSL4; SOX21; AP2M1; CLTA; COL6A3; SCLT1; DCX; DLX1; DLX5; DPYSL3; JAG1; EPHA4; ESR1; ACSL4; FGFR1; FOXG1; SATB2; CNTNAP2; GAS1; AFF4; HTRA2; GNAO1; DLL1; GRM5; HNRNPAB; ID1; ID2; MET; NEUROD2; NF1; NFIB; NOTCH2; NR4A2; PAFAH1B1; PLXNA2; AXL; MAP2K1; PRTFDC1; PTPRM; PVRL1; RAP2A; TGIF2; TNMD; XYLT1; BCL11B; SKIL; SNAP25; SOX2; SOX4; CNTN2; TBX5; TGFBR3; OSGIN2; XBP1; XRCC4; CACNB1;…
GO:0050890	1.15736e-06	4.35002	4.74807	18	131	cognition	CTNND2; EGR1; ACSL4; AFF2; GRM5; GRM7; APP; MEF2C; NEUROD2; NF1; PAFAH1B1; BCHE; SNAP25; TAC1; CNTN2; FOSL1; PPP1R1B; SYNJ1
GO:0051093	1.16997e-06	2.72414	13.773	34	380	negative regulation of developmental process	CDK6; SEMA4F; TOB2; SOX21; AMOT; DLX1; JAG1; RCAN1; EPHA4; FOXG1; DICER1; MSTN; DLL1; TRIB2; ID1; ID2; APP; NEUROD2; NF1; NOTCH1; NOTCH2; LEF1; MARCH5; BCOR; PTPRM; TNMD; XYLT1; SKIL; SOX2; SOX4; CNTN2; TBX5; DIXDC1; ZNF536
GO:0009792	1.31775e-06	2.70809	13.8455	34	382	embryo development ending in birth or egg hatching	AMOT; DLX1; ACSL4; FOXG1; SATB2; FUT8; SIN3A; GAS1; DLL1; HOXB5; NDST1; MBNL1; MYCN; NF1; NOTCH1; LEF1; PDGFRA; PLXNA2; MAP2K1; KIAA1217; TSHZ3; SRSF1; BMI1; SKIL; SMARCA4; SOX4; MAP3K7; XRCC4; ZFAND5; TFEB; SYVN1; LMO4; TCAP; ACVR1
GO:0065007	1.93923e-06	1.53231	292.278	344	8064	biological regulation	FRY; GPR64; MBNL2; CDK6; SPRY3; DNAJA2; MAEA; ZER1; SEMA4F; TOB2; MORF4L1; PNRC1; FERMT2; STON1; ABHD2; CHD3; CHEK1; FOXN3; SOX21; PSIP1; BAZ2A; CELF3; EGLN3; CHP; PALM2; UHRF2; AP2M1; AP1S1; CLTA; DCBLD2; CPEB2; CR2; CREBBP; FAM123B; CSF1R; CSNK1G3; CTH; CTNND2; AMOT; ARHGAP36; DAG1; DAZ1; DBC1; DCX; MIER3; DLX1; DLX5; DPYSL3; JAG1; RCAN1; AGTR2; E2F1; E2F3; E2F5; EIF2C4; EGR1; UBR1; EIF4A2; EIF…
GO:0043543	2.10866e-06	4.37327	4.45812	17	123	protein acylation	MORF4L1; CREBBP; ZDHHC15; PHF15; ZDHHC17; CLIP3; PCK1; LEF1; MSL2; BMI1; SMARCA4; SOX4; TAF5; MAP3K7; NAA50; KAT2B; RPS6KA4
GO:0034645	4.40335e-06	1.54136	132.729	178	3662	cellular macromolecule biosynthetic process	FRY; MAN1A2; MORF4L1; PNRC1; CHD3; CHEK1; FOXN3; SOX21; PSIP1; BAZ2A; MAN1B1; MGAT4A; CPEB2; CREBBP; CTNND2; ZDHHC15; DAZ1; MIER3; DLX1; DLX5; RCAN1; AGTR2; E2F1; E2F3; E2F5; EIF2C4; EGR1; EIF4A2; EIF4E; ELF1; HIPK1; ESR1; ESRRA; EWSR1; EXT2; JMJD1C; IKZF2; FOXG1; ZNF423; POGZ; RTF1; CAMTA1; SATB2; ZDHHC17; DICER1; TARDBP; PHF3; ZNF281; FUT4; FUT8; SIN3A; CLIP3; GLCE; LSM14A; EPC2; MSTN; FOXP1; A…
GO:0007612	4.41331e-06	5.91336	2.4284	12	67	learning	CTNND2; GRM5; GRM7; APP; NEUROD2; NF1; BCHE; TAC1; CNTN2; FOSL1; PPP1R1B; SYNJ1
GO:0009698	5.16278e-06	20.1607	0.507428	6	14	phenylpropanoid metabolic process	UGT1A10; UGT1A8; UGT1A7; UGT1A9; UGT1A1; UGT1A3
GO:0009887	5.72198e-06	2.18348	22.9792	46	634	organ morphogenesis	IRX2; DLX1; DLX5; JAG1; AGTR2; E2F5; ESR1; FOXG1; SATB2; DICER1; SOSTDC1; TIPARP; GAS1; FOXP1; BMP10; SCHIP1; HOXB5; NDST1; ID1; ID2; MEF2C; MYCN; NF1; NF2; NFIB; NOTCH1; NOTCH2; PAFAH1B1; INSIG2; LEF1; PDGFRA; UGT1A1; BCOR; TSHZ3; PTPRM; PVRL1; CCND1; BMI1; BCL11B; SMARCA4; SOX4; TBX5; TGFBR3; ZFAND5; NR4A3; TCAP
GO:0000902	5.72964e-06	2.07891	27.2924	52	753	cell morphogenesis	SEMA4F; DPYSL4; FERMT2; PALM2; AP2M1; CLTA; COL6A3; DCX; DLX5; DPYSL3; EPHA4; ALDOA; FGFR1; FOXG1; DICER1; GAS1; HNRNPAB; ID1; APP; MET; NFIB; NOTCH1; NR4A2; PAFAH1B1; LEF1; DYNC2LI1; PLXNA2; FGD6; AXL; MAP2K1; PRTFDC1; PTPRM; PVRL1; RAP2A; TNMD; XYLT1; BCL11B; SKIL; SMARCA4; SNAP25; CNTN2; TBX5; TGFBR3; CACNB1; CACNB2; CACNB3; NR4A3; PICALM; CNTNAP1; DIXDC1; RPS6KA4; NUMBL
GO:0051254	6.34534e-06	2.01438	30.3369	56	837	positive regulation of RNA metabolic process	PSIP1; CELF3; CREBBP; DLX5; AGTR2; E2F1; E2F3; EGR1; ELF1; ESRRA; FOXG1; ZNF423; SATB2; ZNF281; MSTN; BMP10; GTF2H1; STRN3; HNRNPAB; HNRNPK; ID2; APP; MEF2C; NFATC3; NFIB; NOTCH1; NR4A2; LEF1; WAC; AKIRIN2; FOXJ2; MAP2K1; ATXN7L3; RLF; RREB1; NSD1; TRA2B; BCL11B; SMARCA4; SOX2; SOX4; TBX5; TEAD1; UBE2V1; CNBP; TFEB; TBL1XR1; FOSL1; JHDM1D; TAF15; PICALM; LMO4; KAT2B; RPS6KA4; ACVR1; MAML1
GO:0045665	6.78969e-06	7.11341	1.73975	10	48	negative regulation of neuron differentiation	SOX21; FOXG1; DLL1; ID2; APP; NOTCH1; SOX2; CNTN2; DIXDC1; ZNF536
GO:0010628	7.05438e-06	2.00622	30.4457	56	840	positive regulation of gene expression	PSIP1; CREBBP; DLX5; AGTR2; E2F1; E2F3; EGR1; ELF1; ESR1; ESRRA; FOXG1; ZNF423; SATB2; DICER1; ZNF281; MSTN; BMP10; GTF2H1; STRN3; HNRNPAB; HNRNPK; ID2; APP; MEF2C; NFATC3; NFIB; NOTCH1; NR4A2; LEF1; WAC; AKIRIN2; FOXJ2; ATXN7L3; PTPRJ; RLF; RREB1; NSD1; BCL11B; SMARCA4; SOX2; SOX4; TBX5; TEAD1; UBE2V1; CNBP; TFEB; TBL1XR1; FOSL1; JHDM1D; TAF15; PICALM; LMO4; KAT2B; RPS6KA4; ACVR1; MAML1
GO:2000026	1.05624e-05	1.98769	30.1195	55	831	regulation of multicellular organismal development	CDK6; SEMA4F; TOB2; SOX21; AMOT; DLX1; JAG1; AGTR2; EGR1; EPHA4; ESR1; ESRRA; FOXG1; DICER1; MSTN; FOXP1; BMP10; DLL1; GRM5; ID1; ID2; APP; MEF2C; NEUROD2; NF1; NFIB; NOTCH1; PAFAH1B1; LEF1; BCOR; PTPRM; PURB; PVRL1; RAP2A; TGIF2; TNMD; XYLT1; BMI1; SKIL; BMPR2; SNAP25; SOX2; CNTN2; TBX5; XRCC4; ITM2C; DIXDC1; RIPK2; SYNJ1; ACVR1; SPAG9; MTDH; NUMBL; ZNF536; MAML1
GO:0019585	1.29387e-05	16.1263	0.579917	6	16	glucuronate metabolic process	UGT1A10; UGT1A8; UGT1A7; UGT1A9; UGT1A1; UGT1A3
GO:0048745	1.29387e-05	16.1263	0.579917	6	16	smooth muscle tissue development	TIPARP; FOXP1; SCHIP1; NF1; TSHZ3; ZFAND5
GO:0030509	1.41015e-05	4.76409	3.1533	13	87	BMP signaling pathway	EGR1; ZNF423; SOSTDC1; BMP10; ID1; NOTCH1; LEF1; GREM2; BMPR2; TGFBR3; UBE2D3; ACVR1; ZFYVE16
GO:0051173	1.55457e-05	1.90127	34.3239	60	947	positive regulation of nitrogen compound metabolic process	PSIP1; CELF3; CREBBP; DLX5; AGTR2; E2F1; E2F3; EGR1; ELF1; ESRRA; FOXG1; ZNF423; SATB2; ZNF281; GCG; MSTN; BMP10; GTF2H1; STRN3; HNRNPAB; HNRNPK; ID2; APP; MEF2C; NFATC3; NFIB; NOTCH1; NR4A2; LEF1; WAC; PDGFRA; AKIRIN2; FOXJ2; MAP2K1; PRTFDC1; ATXN7L3; RLF; RREB1; NSD1; TRA2B; BCL11B; SMARCA4; SOX2; SOX4; TBX5; TEAD1; AREGB; UBE2V1; CNBP; TFEB; TBL1XR1; FOSL1; JHDM1D; TAF15; PICALM; LMO4; KAT2B; …
GO:0048812	1.62087e-05	2.23391	18.9561	39	523	neuron projection morphogenesis	SEMA4F; DPYSL4; AP2M1; CLTA; COL6A3; DCX; DLX5; DPYSL3; EPHA4; FGFR1; FOXG1; DICER1; GAS1; APP; MET; NFIB; NOTCH1; NR4A2; PAFAH1B1; PLXNA2; MAP2K1; PRTFDC1; PTPRM; PVRL1; RAP2A; XYLT1; BCL11B; SKIL; SNAP25; CNTN2; CACNB1; CACNB2; CACNB3; NR4A3; PICALM; CNTNAP1; DIXDC1; RPS6KA4; NUMBL
GO:0009987	2.0356e-05	2.28983	55.1706	77	2075	cellular process	ACTR1A; RBM7; SLC2A13; AP1S1; COL6A3; COL12A1; COPB1; SCLT1; FRMPD2; IGSF5; DMWD; FHL3; TRAPPC8; DAAM1; FLOT2; MMD; MYRIP; GIGYF2; CLUL1; PCDH11X; SLCO3A1; RGPD4; GTPBP8; SNX15; HOXB5; KCNA4; KCND2; KCNJ14; KRT5; FAM21A; ACCN1; LPP; CLDN11; DYNC2LI1; PLXNA2; TTC19; PACS1; LMBR1L; FAM21B; SEPT3; PCDHA7; DAZ3; DAZ2; DAZ4; XPO5; PCDH19; KLHL1; HCN3; CADM3; JAM2; SCN1A; SRPR; STAU1; TPD52; NXF2B; RGP…
GO:0010557	2.0814e-05	1.90081	33.1278	58	914	positive regulation of macromolecule biosynthetic process	PSIP1; CREBBP; DAZ1; DLX5; AGTR2; E2F1; E2F3; EGR1; ELF1; ESRRA; FOXG1; ZNF423; SATB2; ZNF281; MSTN; BMP10; GTF2H1; STRN3; HNRNPAB; HNRNPK; ID2; APP; JAK2; MEF2C; NFATC3; NFIB; NOTCH1; NR4A2; LEF1; WAC; PDGFRA; AKIRIN2; FOXJ2; ATXN7L3; RLF; RREB1; NSD1; BCL11B; SMARCA4; BOLL; SOX2; SOX4; TBX5; TEAD1; AREGB; UBE2V1; CNBP; TFEB; TBL1XR1; FOSL1; JHDM1D; TAF15; PICALM; LMO4; KAT2B; RPS6KA4; ACVR1; MA…
GO:0019219	2.34238e-05	1.51222	115.331	155	3182	regulation of nucleobase-containing compound metabolic process	FRY; MBNL2; MORF4L1; PNRC1; CHD3; FOXN3; SOX21; PSIP1; BAZ2A; CELF3; CREBBP; CTNND2; MIER3; DLX1; DLX5; RCAN1; AGTR2; E2F1; E2F3; E2F5; EGR1; ELF1; EPHA4; HIPK1; ESR1; ESRRA; EWSR1; JMJD1C; IKZF2; FOXG1; ZNF423; POGZ; RTF1; CAMTA1; SATB2; AFF2; DICER1; TARDBP; ZNF281; SIN3A; EPC2; GCG; RGS17; MSTN; FOXP1; AFF4; BMP10; GNAO1; GRM5; GRM7; GTF2H1; STRN3; HIVEP1; HIVEP2; HNRNPAB; HNRNPK; HNRNPU; APBB…
GO:0048667	2.63146e-05	2.20519	18.6661	38	515	cell morphogenesis involved in neuron differentiation	SEMA4F; DPYSL4; AP2M1; CLTA; COL6A3; DCX; DLX5; DPYSL3; EPHA4; FGFR1; FOXG1; GAS1; APP; MET; NFIB; NOTCH1; NR4A2; PAFAH1B1; PLXNA2; MAP2K1; PRTFDC1; PTPRM; PVRL1; RAP2A; XYLT1; BCL11B; SKIL; SNAP25; CNTN2; CACNB1; CACNB2; CACNB3; NR4A3; PICALM; CNTNAP1; DIXDC1; RPS6KA4; NUMBL
GO:0050794	3.46461e-05	1.52198	150.659	189	4734	regulation of cellular process	FRY; GPR64; MBNL2; SPRY3; DNAJA2; ZER1; MORF4L1; PNRC1; FERMT2; STON1; CHD3; PSIP1; CELF3; EGLN3; CHP; PALM2; CPEB2; CR2; FAM123B; CSF1R; CSNK1G3; CTNND2; AMOT; ARHGAP36; DAZ1; DCX; MIER3; DLX5; DPYSL3; E2F3; E2F5; EIF4A2; HIPK1; EPS8; ESRRA; EWSR1; EXT2; ACSL1; FCGR1A; FCGR1B; JMJD1C; FGB; ALDOA; FGFR1; FIGF; IKZF2; POGZ; RTF1; CAMTA1; TRIM2; AFF2; ZDHHC17; CORO1C; TIPARP; CNTNAP2; PPP1R16B; LSM…
GO:0032990	4.84584e-05	2.07288	21.3482	41	589	cell part morphogenesis	SEMA4F; DPYSL4; AP2M1; CLTA; COL6A3; DCX; DLX5; DPYSL3; EPHA4; FGFR1; FOXG1; DICER1; GAS1; APP; MET; MTM1; NFIB; NOTCH1; NR4A2; PAFAH1B1; DYNC2LI1; PLXNA2; MAP2K1; PRTFDC1; PTPRM; PVRL1; RAP2A; XYLT1; BCL11B; SKIL; SNAP25; CNTN2; CACNB1; CACNB2; CACNB3; NR4A3; PICALM; CNTNAP1; DIXDC1; RPS6KA4; NUMBL
GO:0021537	5.56318e-05	3.63621	4.60309	15	127	telencephalon development	DLX1; DICER1; CNTNAP2; ID2; NF1; NFIB; PAFAH1B1; LEF1; PRTFDC1; BCL11B; CNTN2; LRP8; NR4A3; DIXDC1; NUMBL
GO:0009889	7.098e-05	1.47482	115.005	152	3173	regulation of biosynthetic process	FRY; MORF4L1; PNRC1; CHD3; FOXN3; SOX21; PSIP1; BAZ2A; CPEB2; CREBBP; CTNND2; DAZ1; MIER3; DLX1; DLX5; RCAN1; AGTR2; E2F1; E2F3; E2F5; EIF2C4; EGR1; EIF4A2; EIF4E; ELF1; HIPK1; ESR1; ESRRA; EWSR1; JMJD1C; IKZF2; FOXG1; ZNF423; POGZ; RTF1; CAMTA1; SATB2; DICER1; TARDBP; ZNF281; SIN3A; LSM14A; EPC2; GCG; MSTN; FOXP1; AFF4; BMP10; TRIB2; GRM5; GRM7; GTF2H1; STRN3; HIVEP1; HIVEP2; HNRNPAB; HNRNPK; AP…
GO:0016569	7.17769e-05	2.73129	8.77125	22	242	covalent chromatin modification	MORF4L1; BAZ2A; CREBBP; RTF1; PHF15; JAK2; LEF1; WAC; BCOR; MSL2; PRKCB; ATXN7L3; SATB1; NSD1; BMI1; SMARCA4; TAF5; MAP3K7; UBE2E1; JHDM1D; KAT2B; RPS6KA4
GO:0007275	7.40625e-05	1.54307	85.2302	118	2509	multicellular organismal development	DCAF7; SPRY3; MAEA; DPYSL4; TRIM3; RAI2; MAN1A2; AP2M1; CLTA; COL6A3; COL12A1; SCLT1; CSF1R; CTNND2; ASPRV1; DAZ1; DCX; DLX5; DPYSL3; RCAN1; E2F1; E2F5; ACSL4; FGFR1; FHL3; FIGF; ZNF423; FLOT2; AFF2; PHF3; FUT8; SIN3A; TIPARP; CNTNAP2; LSM14A; HTRA2; GMFB; GNAO1; SCHIP1; HNRNPAB; NDST1; JAK2; ARF4; KRT5; ACCN1; MARK1; MBNL1; MET; MYCN; NF2; NOTCH2; NR4A2; CLDN11; PAM; APH1A; INSIG2; PDGFRA; ASB1;…
GO:0031328	7.76011e-05	1.78479	36.2811	60	1001	positive regulation of cellular biosynthetic process	PSIP1; CREBBP; DAZ1; DLX5; AGTR2; E2F1; E2F3; EGR1; ELF1; ESRRA; FOXG1; ZNF423; SATB2; ZNF281; GCG; MSTN; BMP10; GTF2H1; STRN3; HNRNPAB; HNRNPK; ID2; APP; MEF2C; NFATC3; NFIB; NOTCH1; NR4A2; LEF1; WAC; PDGFRA; AKIRIN2; FOXJ2; MAP2K1; ATXN7L3; GPAM; RLF; RREB1; NSD1; BCL11B; SMARCA4; BOLL; SOX2; SOX4; TBX5; TEAD1; AREGB; UBE2V1; CNBP; TFEB; TBL1XR1; FOSL1; JHDM1D; TAF15; PICALM; LMO4; KAT2B; RPS6K…
GO:0030900	9.70282e-05	4.1463	3.26816	12	92	forebrain development	E2F1; FOXG1; HTRA2; GNAO1; NDST1; APP; NOTCH1; NR4A2; AXL; SMARCA4; SOX2; PGAP1
GO:0022008	0.000108137	1.97435	22.8889	42	653	neurogenesis	CDK6; DPYSL4; AP2M1; CLTA; COL6A3; SCLT1; DCX; DLX5; DPYSL3; JAG1; ACSL4; FGFR1; SATB2; CNTNAP2; GAS1; HTRA2; GNAO1; MARK1; MET; NF2; NFIB; NR4A2; LEF1; PDGFRA; PLXNA2; AXL; MAP2K1; PRTFDC1; PTPRM; PVRL1; BCL2; BCL11B; SMARCA4; SNAP25; SOX4; CACNB1; CACNB2; CACNB3; NR4A3; PICALM; CNTNAP1; RPS6KA4
GO:0048598	0.000133187	2.2666	13.773	29	380	embryonic morphogenesis	IRX2; AMOT; DLX5; FOXG1; SATB2; DICER1; GAS1; HOXB5; NDST1; ID2; MBNL1; MEF2C; MYCN; NF2; NOTCH1; INSIG2; LEF1; NSD1; BMI1; BMPR2; SMARCA4; SOX2; SOX4; MAP3K7; TBX5; NR4A3; LMO4; TCAP; ACVR1
GO:0007610	0.000133396	2.23193	14.4617	30	399	behavior	CTNND2; AGTR2; EGR1; EPHA4; ACSL4; FIGF; AFF2; CNTNAP2; GCG; HTRA2; GNAO1; GRM5; GRM7; APP; IL16; MEF2C; NEUROD2; NF1; NOVA1; NR4A2; PAFAH1B1; PRTFDC1; BCHE; SNAP25; TAC1; CNTN2; NR4A3; FOSL1; PPP1R1B; SYNJ1
GO:0060255	0.000139332	1.42522	137.694	175	3799	regulation of macromolecule metabolic process	FRY; MBNL2; CDK6; ZER1; TOB2; MORF4L1; PNRC1; CHD3; CHEK1; FOXN3; SOX21; PSIP1; BAZ2A; CELF3; CPEB2; CREBBP; CTNND2; DAZ1; MIER3; DLX1; DLX5; RCAN1; AGTR2; E2F1; E2F3; E2F5; EIF2C4; EGR1; EIF4A2; EIF4E; ELF1; HIPK1; ESR1; ESRRA; EWSR1; JMJD1C; FGFR1; IKZF2; FOXG1; ZNF423; POGZ; RTF1; CAMTA1; SATB2; AFF2; DICER1; TARDBP; ZNF281; SIN3A; CLIP3; LSM14A; EPC2; GCG; MSTN; FOXP1; AFF4; BMP10; TRIB2; GRM…
GO:0006355	0.000155691	1.47434	97.8248	131	2699	regulation of transcription	DNA-dependent	FRY; MORF4L1; PNRC1; CHD3; FOXN3; SOX21; PSIP1; BAZ2A; CREBBP; CTNND2; MIER3; DLX1; DLX5; RCAN1; AGTR2; E2F1; E2F3; E2F5; EGR1; ELF1; HIPK1; ESR1; ESRRA; EWSR1; JMJD1C; IKZF2; FOXG1; ZNF423; POGZ; RTF1; CAMTA1; SATB2; DICER1; TARDBP; ZNF281; SIN3A; EPC2; MSTN; FOXP1; AFF4; BMP10; GRM5; GTF2H1; STRN3; HIVEP1; HIVEP2; HNRNPAB; HNRNPK; APBB2; ID1; ID2; APP; IGSF1; IL16; VGLL3; MEF2C; MLLT3; MYCN; NE…
GO:0051271	0.000160246	3.91063	3.44326	12	95	negative regulation of cellular component movement	ABHD2; DAG1; AGTR2; BMP10; NF1; NF2; PTPRJ; PTPRM; RAP2A; TBX5; TGFBR3; VCL
GO:0051716	0.000166594	1.40121	161.58	200	4458	cellular response to stimulus	GPR64; SPRY3; MORF4L1; CHEK1; FOXN3; CHI3L1; CHP; AP2M1; CLTA; DCBLD2; CR2; CREBBP; FAM123B; CSF1R; CSNK1G3; EME1; CTNND2; ARHGAP36; DAG1; DCX; DLX5; DPYSL3; JAG1; RCAN1; AGTR2; E2F1; EGR1; UBR1; EIF4E; ELF1; EPHA4; EPS8; ESR1; ESRRA; EXT2; FCGR1A; FCGR1B; FGB; FGFR1; FIGF; ZNF423; ATMIN; ZDHHC17; DICER1; CORO1C; SOSTDC1; SIN3A; TIPARP; CNTNAP2; PPP1R16B; EPC2; GAS1; GCG; RGS17; MSTN; PDE7B; BMP1…
GO:0060021	0.000167096	5.16282	2.02971	9	56	palate development	SATB2; TIPARP; GAS1; SCHIP1; INSIG2; LEF1; PDGFRA; BCOR; TGFBR3
GO:0007167	0.000170307	1.85665	27.1474	47	749	enzyme linked receptor protein signaling pathway	AP2M1; CLTA; CSF1R; AGTR2; EGR1; EIF4E; EPS8; ESR1; FGFR1; FIGF; ZNF423; SOSTDC1; TIPARP; MSTN; BMP10; SCHIP1; SH3KBP1; NDST1; ID1; APP; JAK2; ARF4; MEF2C; MET; NOTCH1; APH1A; LEF1; PDGFRA; AXL; MAP2K1; PTPN2; PTPRJ; GREM2; SKIL; BMPR2; MAP3K7; TGFBR3; TTK; AREGB; UBE2D3; ZFAND5; CASP2; CBL; RIPK2; ACVR1; MPZL1; ZFYVE16
GO:0021954	0.000181173	6.97308	1.23232	7	34	central nervous system neuron development	EPHA4; FOXG1; NFIB; NR4A2; PAFAH1B1; PRTFDC1; CNTN2
GO:0018076	0.000184293	80.2214	0.144979	3	4	N-terminal peptidyl-lysine acetylation	CREBBP; SOX4; KAT2B
GO:0007220	0.000192314	12.1926	0.579917	5	16	Notch receptor processing	JAG1; DLL1; NOTCH1; NOTCH2; APH1A
GO:0045667	0.000201573	4.49807	2.53714	10	70	regulation of osteoblast differentiation	CDK6; DLX5; ESRRA; ID1; ID2; MEF2C; NOTCH1; HEMGN; BMPR2; ACVR1
GO:0045944	0.000227038	2.05036	17.76	34	490	positive regulation of transcription from RNA polymerase II promoter	PSIP1; CREBBP; E2F1; EGR1; ELF1; ESRRA; FOXG1; SATB2; GTF2H1; STRN3; HNRNPK; APP; MEF2C; NFATC3; NFIB; NOTCH1; NR4A2; LEF1; AKIRIN2; RLF; BCL11B; SMARCA4; SOX2; SOX4; TBX5; TEAD1; CNBP; TFEB; TBL1XR1; FOSL1; LMO4; KAT2B; RPS6KA4; MAML1
GO:0043412	0.000237335	1.49644	80.1011	110	2210	macromolecule modification	CDK6; DCAF7; ZER1; MAN1A2; MORF4L1; METAP2; CHEK1; BAZ2A; MAN1B1; MGAT4A; UHRF2; CREBBP; CSNK1G3; CTH; ZDHHC15; EGR1; EPHA4; FGFR1; RTF1; TRIM2; PHF15; ZDHHC17; FRK; FUT4; FUT8; TIPARP; CLIP3; FBXO10; GCG; BMP10; GMFB; TRIB2; GRM5; GSPT1; GTF2H1; NDST1; APP; JAK2; MARK1; MTM1; NEUROD2; NF1; NF2; PAM; PCK1; PCMT1; LEF1; WAC; PDGFRA; GALNT7; PGGT1B; PIGC; MARCH5; BCOR; PPM1B; RFWD3; MSL2; PPP2R3A; …
GO:0030182	0.000245187	1.81235	28.3615	48	795	neuron differentiation	SEMA4F; DPYSL4; AP2M1; CLTA; COL6A3; SCLT1; DCX; DLX1; DLX5; DPYSL3; JAG1; EPHA4; ACSL4; FGFR1; DICER1; CNTNAP2; GAS1; HTRA2; GNAO1; MEF2C; MET; NEUROD2; NFIB; NR4A2; PAFAH1B1; LEF1; PLXNA2; MAP2K1; PRTFDC1; PTPRM; PVRL1; RAP2A; TGIF2; XYLT1; BCL11B; SKIL; SNAP25; SOX4; CACNB1; CACNB2; CACNB3; NR4A3; ITM2C; PICALM; CNTNAP1; RPS6KA4; SPAG9; NUMBL
GO:0007411	0.000247226	2.28644	12.2145	26	337	axon guidance	SEMA4F; DPYSL4; AP2M1; CLTA; COL6A3; DCX; DLX5; DPYSL3; EPHA4; FGFR1; FOXG1; GAS1; APP; MET; NFIB; PLXNA2; MAP2K1; PTPRM; PVRL1; CNTN2; CACNB1; CACNB2; CACNB3; NR4A3; CNTNAP1; RPS6KA4
GO:0061061	0.000260381	2.23904	12.9394	27	357	muscle structure development	COL6A3; JAG1; RCAN1; FHL3; DICER1; MSTN; FOXP1; BMP10; APP; MBNL1; MEF2C; NF1; NFATC3; NOTCH1; LEF1; PDGFRA; SEMA4C; TSHZ3; SKIL; TBX5; TGFBR3; CACNB2; CASQ1; TCAP; ACVR1; SPAG9; MAML1
GO:0017145	0.000264368	11.1758	0.616162	5	17	stem cell division	NOTCH1; PAFAH1B1; LEF1; BMI1; NUMBL
GO:0051128	0.000280582	1.73061	34.0339	55	939	regulation of cellular component organization	SEMA4F; FERMT2; STON1; PALM2; DCBLD2; CTH; AMOT; AGTR2; EPHA4; ALDOA; CLIP3; PPP1R16B; BMP10; HNRNPK; APBB2; HSPA1B; MTM1; NEUROD2; NF2; NOTCH1; PAFAH1B1; DERL2; DYNC1LI1; LEF1; MARCH5; BCOR; PPP2R5A; FGD6; PTPRJ; PVRL1; RAP2A; BCL2; XYLT1; SIPA1; SKIL; BMPR2; SMARCA4; SNAP25; TAC1; CNTN2; TBX5; TTK; UBE2E1; PIF1; ITM2C; CAPZA1; PICALM; DIXDC1; BLZF1; CBL; SYNJ1; RPS6KA4; NUMBL; EI24; ZFYVE16
GO:0006475	0.000287145	3.64542	3.66073	12	101	internal protein amino acid acetylation	MORF4L1; CREBBP; PHF15; PCK1; LEF1; MSL2; BMI1; SMARCA4; TAF5; MAP3K7; KAT2B; RPS6KA4
GO:0040013	0.000287145	3.64542	3.66073	12	101	negative regulation of locomotion	ABHD2; DAG1; AGTR2; BMP10; GRM5; NF1; NF2; PTPRJ; PTPRM; RAP2A; TBX5; VCL
GO:0032774	0.000295719	1.43667	105.581	138	2913	RNA biosynthetic process	FRY; MORF4L1; PNRC1; CHD3; FOXN3; SOX21; PSIP1; BAZ2A; CREBBP; CTNND2; MIER3; DLX1; DLX5; RCAN1; AGTR2; E2F1; E2F3; E2F5; EGR1; ELF1; HIPK1; ESR1; ESRRA; EWSR1; JMJD1C; IKZF2; FOXG1; ZNF423; POGZ; RTF1; CAMTA1; SATB2; DICER1; TARDBP; PHF3; ZNF281; SIN3A; EPC2; MSTN; FOXP1; AFF4; BMP10; GRM5; GTF2H1; STRN3; HIVEP1; HIVEP2; HNRNPAB; HNRNPK; APBB2; ID1; ID2; APP; IGSF1; IL16; VGLL3; MEF2C; MLLT3; MY…
GO:0030336	0.000295774	3.9093	3.1533	11	87	negative regulation of cell migration	ABHD2; DAG1; AGTR2; BMP10; NF1; NF2; PTPRJ; PTPRM; RAP2A; TBX5; VCL
GO:0023052	0.000298776	1.38982	149.003	185	4111	signaling	GPR64; SPRY3; SEMA4F; CHP; AP2M1; CLTA; DCBLD2; CR2; CREBBP; FAM123B; CSF1R; CSNK1G3; CTNND2; ARHGAP36; ZDHHC15; DAG1; DCX; DLX5; DPYSL3; JAG1; RCAN1; AGTR2; EGR1; UBR1; EIF4E; ELF1; EPS8; ESR1; ESRRA; EXT2; FCGR1A; FCGR1B; FGB; FGFR1; FIGF; ZNF423; ZDHHC17; DICER1; CORO1C; SOSTDC1; TIPARP; CNTNAP2; PPP1R16B; GAS1; GCG; RGS17; MSTN; PDE7B; BMP10; GMFB; GNAO1; GNL1; DLL1; ANK3; GRIA2; GRIA3; TRIB2…
GO:0000085	0.000300991	17.8547	0.362448	4	10	G2 phase of mitotic cell cycle	FOXN3; E2F1; E2F3; APP
GO:0014013	0.000343372	5.25288	1.776	8	49	regulation of gliogenesis	DLX1; EPHA4; DICER1; ID2; NF1; NOTCH1; CNTN2; SYNJ1
GO:0031365	0.000355205	10.3154	0.652407	5	18	N-terminal protein amino acid modification	METAP2; CREBBP; SOX4; NAA50; KAT2B
GO:0042573	0.000355205	10.3154	0.652407	5	18	retinoic acid metabolic process	UGT1A8; UGT1A7; UGT1A9; UGT1A1; UGT1A3
GO:0044237	0.000357734	1.36386	288.763	327	7967	cellular metabolic process	FRY; MBNL2; CDK6; HNRNPR; DCAF7; GPHN; DNAJA2; ZER1; DDX17; DPYSL4; SMC2; MAN1A2; MORF4L1; PNRC1; METAP2; CHD3; CHEK1; FOXN3; SOX21; PSIP1; BAZ2A; CELF3; MAN1B1; MGAT4A; UHRF2; CPEB2; CREBBP; CSNK1G3; EME1; CTH; CTNND2; ZDHHC15; DAZ1; MIER3; DLX1; DLX5; DPYSL3; JAG1; RCAN1; AGTR2; E2F1; E2F3; E2F5; EIF2C4; EGR1; UBR1; EIF4A2; EIF4E; ELF1; EPHA4; HIPK1; ESR1; ESRRA; EWSR1; EXT2; ACSL1; ACSL4; JMJD…
GO:0018205	0.000374921	3.31824	4.31314	13	119	peptidyl-lysine modification	MORF4L1; CREBBP; CTH; PHF15; LEF1; MSL2; BMI1; SMARCA4; SOX4; TAF5; MAP3K7; KAT2B; RPS6KA4
GO:0030030	0.000401777	1.77911	28.1985	47	778	cell projection organization	SEMA4F; DPYSL4; AP2M1; CLTA; COL6A3; DCX; DLX5; DPYSL3; EPHA4; ACSL4; FGFR1; FOXG1; DICER1; CNTNAP2; PPP1R16B; GAS1; GNAO1; APP; MET; NFIB; NOTCH1; NR4A2; PAFAH1B1; DYNC2LI1; PLXNA2; FGD6; MAP2K1; PRTFDC1; PTPRM; PVRL1; RAP2A; XYLT1; BCL11B; SKIL; SNAP25; CNTN2; VCL; CACNB1; CACNB2; CACNB3; NR4A3; ITM2C; PICALM; CNTNAP1; DIXDC1; RPS6KA4; NUMBL
GO:0001655	0.000409887	2.74702	6.7053	17	185	urogenital system development	IRX2; AGTR2; EGR1; ESR1; TIPARP; SCHIP1; ID2; MEF2C; NF1; NOTCH1; APH1A; LEF1; PDGFRA; PLAG1; TSHZ3; SOX4; ACVR1
GO:0097150	0.0004483	40.1078	0.181224	3	5	neuronal stem cell maintenance	JAG1; DLL1; NOTCH1
GO:0021952	0.000459469	15.3029	0.398693	4	11	central nervous system projection neuron axonogenesis	EPHA4; NFIB; NR4A2; PAFAH1B1
GO:0033151	0.000459469	15.3029	0.398693	4	11	V(D)J recombination	FOXP1; LEF1; BCL11B; XRCC4
GO:0048715	0.000459469	15.3029	0.398693	4	11	negative regulation of oligodendrocyte differentiation	DLX1; ID2; NF1; NOTCH1
GO:0048710	0.000467798	9.57786	0.688652	5	19	regulation of astrocyte differentiation	EPHA4; ID2; NF1; NOTCH1; CNTN2
GO:0060537	0.000483205	2.61554	7.42543	18	207	muscle tissue development	RCAN1; DICER1; MSTN; BMP10; APP; MBNL1; MEF2C; NOTCH1; LEF1; PDGFRA; SKIL; TBX5; TGFBR3; CACNB2; CASQ1; TCAP; ACVR1; MAML1
GO:0007519	0.000517026	3.19666	4.45812	13	123	skeletal muscle tissue development	RCAN1; MSTN; FOXP1; APP; MBNL1; MEF2C; NF1; NOTCH1; SKIL; CACNB2; CASQ1; ACVR1; MAML1
GO:0050680	0.000528308	4.33029	2.35591	9	65	negative regulation of epithelial cell proliferation	CDK6; GAS1; NF1; NFIB; PTPRM; TNMD; SOX2; TGFBR3; AIMP1
GO:0048646	0.000529795	1.85761	22.3631	39	617	anatomical structure formation involved in morphogenesis	IRX2; AMOT; DLX5; JAG1; FIGF; FOXG1; DICER1; BMP10; DLL1; ID1; MEF2C; NF1; NF2; NFATC3; NOTCH1; PAFAH1B1; LEF1; PDGFRA; DYNC2LI1; PLXNA2; PTPRM; TNMD; SKIL; BMPR2; SMARCA4; SOX2; SOX4; MAP3K7; TBX5; TGFBR3; UBP1; LRP8; NR4A3; CNTNAP1; LMO4; TCAP; ACVR1; MTDH; AIMP1
GO:0008284	0.000550549	1.92258	19.391	35	535	positive regulation of cell proliferation	CDK6; DNAJA2; DLX5; E2F1; E2F3; EGR1; ESR1; FGFR1; FIGF; FOXG1; GAS1; FOXP1; BMP10; ID2; MEF2C; MYCN; NF1; NOTCH1; DERL2; LEF1; PDGFRA; PGGT1B; AKIRIN2; GPAM; CCND1; BCL2; BMI1; BMPR2; SOX4; TAC1; TTK; XRCC4; CNBP; FOSL1; RIPK2
GO:0030097	0.000562806	2.12043	13.5918	27	375	hemopoiesis	CDK6; MAEA; TOB2; JAG1; EGR1; ESRRA; TIPARP; FOXP1; DLL1; ID2; JAK2; MEF2C; NOTCH1; NOTCH2; LEF1; PURB; SATB1; BMI1; BCL11B; SMARCA4; SOX4; TGFBR3; TPD52; XRCC4; PICALM; CBFA2T3; RIPK2
GO:0016573	0.000580778	3.5778	3.40702	11	94	histone acetylation	MORF4L1; CREBBP; PHF15; LEF1; MSL2; BMI1; SMARCA4; TAF5; MAP3K7; KAT2B; RPS6KA4
GO:0055001	0.000581149	3.34285	3.95069	12	109	muscle cell development	RCAN1; DICER1; BMP10; APP; MEF2C; NFATC3; NOTCH1; LEF1; PDGFRA; CACNB2; TCAP; MAML1
GO:0040011	0.000606404	1.68612	33.5273	53	940	locomotion	SEMA4F; DPYSL4; CELF3; AP2M1; CLTA; COL6A3; AMOT; DCX; DLX5; DPYSL3; JAG1; EPHA4; FGFR1; FIGF; FOXG1; SATB2; GAS1; CXCL2; SCHIP1; ID1; APP; IL16; MARK1; MET; NFIB; NR4A2; PAFAH1B1; LEF1; PDGFRA; PLXNA2; WDR44; AXL; MAP2K1; PVRL1; JAM2; BMPR2; TAC1; CNTN2; TGFBR3; ZFAND5; LRP8; CACNB1; CACNB2; CACNB3; NR4A3; FOSL1; PIP5K1A; CNTNAP1; DIXDC1; RPS6KA4; ACVR1; SPAG9; AIMP1
GO:0019226	0.000616388	1.8266	23.3054	40	643	transmission of nerve impulse	AP2M1; CTNND2; ZDHHC15; EGR1; DICER1; CNTNAP2; PDE7B; GRIA2; GRIA3; GRM5; GRM7; APP; KCNA4; KCND2; KCNJ14; ACCN1; MEF2C; NEUROD2; NF1; NOVA1; CLDN11; PAFAH1B1; PLCB2; PNOC; PRKCB; HCN3; PVRL1; BCHE; SNAP25; ABCC8; VAMP2; SYT1; TAC1; CNTN2; XBP1; CACNA1E; CACNB2; CACNB3; CNTNAP1; SYNJ1
GO:0051726	0.000616388	1.8266	23.3054	40	643	regulation of cell cycle	CDK6; MAEA; CHEK1; FOXN3; UHRF2; CREBBP; DBC1; E2F1; EIF4E; FOXG1; GAS1; GTF2H1; APBB2; ID2; APP; NOTCH2; PAFAH1B1; DYNC1LI1; LEF1; WAC; PGGT1B; RFWD3; PKIA; MAP2K1; CCND1; SIPA1; SKIL; SMARCA4; SOX2; SOX4; TTK; UBE2E1; NR4A3; FOSL1; PKP4; KAT2B; NAE1; SMC3; CCNE2; CDC25A
GO:0042221	0.000626831	1.43808	87.5313	116	2415	response to chemical stimulus	SEMA4F; DPYSL4; CHEK1; CHI3L1; PSIP1; EGLN3; AP2M1; CLTA; COL6A3; CREBBP; AMOT; DCX; DLX5; DPYSL3; JAG1; RCAN1; E2F1; EGR1; UBR1; EIF4E; EPHA4; ESR1; ACSL4; FCGR1A; FCGR1B; FGB; FGFR1; FIGF; FOXG1; DICER1; SIN3A; GAS1; GCG; MSTN; GNAO1; CXCL2; STRN3; HSPA1B; ID1; ID2; APP; IL16; JAK2; MEF2C; MET; MGST3; NEUROD2; NF1; NFATC3; NFIB; NOTCH1; NR4A2; GPX8; PAM; DERL2; PCK1; INSIG2; LEF1; PDGFRA; PGGT1…
GO:0044267	0.000685531	1.41209	100.382	130	2793	cellular protein metabolic process	CDK6; DCAF7; GPHN; DNAJA2; ZER1; MAN1A2; MORF4L1; METAP2; CHEK1; BAZ2A; MAN1B1; MGAT4A; UHRF2; CPEB2; CREBBP; CSNK1G3; CTH; ZDHHC15; DAZ1; EIF2C4; EGR1; UBR1; EIF4A2; EIF4E; EPHA4; FGFR1; RTF1; TRIM2; PHF15; ZDHHC17; FRK; FUT4; FUT8; TIPARP; CLIP3; LSM14A; FBXO10; GCG; BMP10; GMFB; TRIB2; GRM5; GSPT1; GTF2H1; HSPA1B; NDST1; APP; JAK2; MARK1; MTM1; NEUROD2; NF1; NF2; PAM; DERL2; PCK1; PCMT1; LEF1;…
GO:0071840	0.000741959	1.37014	132.765	165	3663	cellular component organization or biogenesis	MAEA; SEMA4F; DPYSL4; SMC2; MORF4L1; FERMT2; STON1; CHD3; PSIP1; BAZ2A; PALM2; AP2M1; AP1S1; CLTA; COL6A3; COL12A1; COPB1; DCBLD2; SCLT1; CREBBP; FRMPD2; CTH; AMOT; ZDHHC15; DAG1; DCX; DLX5; DPYSL3; AGTR2; EPHA4; ACSL4; FCGR1A; JMJD1C; FGB; ALDOA; FGFR1; FHL3; FOXG1; DAAM1; POGZ; RTF1; SATB2; PHF15; DICER1; CORO1C; CLIP3; CNTNAP2; PPP1R16B; LSM14A; EPC2; GAS1; BMP10; HTRA2; GNAO1; GTPBP8; SH3KBP1…
GO:0060322	0.000748757	6.44361	1.12359	6	31	head development	TIPARP; SCHIP1; LEF1; PDGFRA; ZFAND5; PGAP1
GO:0010001	0.000804307	3.20954	4.09567	12	113	glial cell differentiation	DLX1; EPHA4; DICER1; ID2; NF1; NFIB; NOTCH1; BCL2; SMARCA4; SOX2; SOX4; CNTN2
GO:0035303	0.00081875	5.22644	1.55853	7	43	regulation of dephosphorylation	RCAN1; AGTR2; MEF2C; PPP2R5A; AKAP1; AKAP6; SMG7
GO:0055007	0.00081875	5.22644	1.55853	7	43	cardiac muscle cell differentiation	DICER1; FOXP1; BMP10; MEF2C; PDGFRA; TBX5; TCAP
GO:0050767	0.000880939	2.3429	9.13291	20	255	regulation of neurogenesis	SEMA4F; SOX21; FOXG1; DLL1; GRM5; APP; MEF2C; NEUROD2; PAFAH1B1; RAP2A; TGIF2; XYLT1; SKIL; SOX2; XRCC4; ITM2C; DIXDC1; SPAG9; NUMBL; ZNF536
GO:0007389	0.000882588	2.11746	12.577	25	347	pattern specification process	FOXN3; IRX2; DLX1; FOXG1; SATB2; SOSTDC1; GAS1; FOXP1; DLL1; HOXB5; MEF2C; MLLT3; NFATC3; NOTCH1; LEF1; DYNC2LI1; PLXNA2; BCOR; FOXJ2; BMI1; BMPR2; TBX5; PGAP1; TCAP; ACVR1
GO:0022603	0.000940541	1.98693	15.5128	29	428	regulation of anatomical structure morphogenesis	SEMA4F; FERMT2; PALM2; AMOT; AGTR2; EPHA4; ESR1; ALDOA; DICER1; FOXP1; ID1; NF1; NFIB; NOTCH1; PAFAH1B1; LEF1; MARCH5; BCOR; FGD6; PTPRM; RAP2A; TNMD; XYLT1; SKIL; CNTN2; TBX5; DIXDC1; MTDH; NUMBL
GO:0001701	0.000948161	2.45483	7.86513	18	217	in utero embryonic development	AMOT; FUT8; SIN3A; MBNL1; NOTCH1; LEF1; PDGFRA; MAP2K1; TSHZ3; SRSF1; BMI1; SKIL; SMARCA4; XRCC4; ZFAND5; TFEB; SYVN1; ACVR1
